# Supplementary material for: A Novel Strategy for the Synthesis of High Stability of Luminescent Zero Dimensional–Two Dimensional CsPbBr3 Quantum Dot/1,4-bis(4-methylstyryl)benzene Nanoplate Heterostructures at an Atmospheric Condition
Source: MDPI journal article supplement (doi:10.3390/nano13192723), 2023-10-07
Supplement: s1 [file s1]

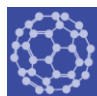

Supplementary Materials

# A Novel Strategy for the Synthesis of High Stability of Luminescent 0D-2D CsPbBr<sub>3</sub> QD/*p*-MSB Nanoplate Heterostructures at an Atmospheric Condition

Yanran Wang<sup>1,2</sup>, Ming-Yu Li<sup>1,2,\*</sup>, Shijie Liu<sup>2</sup>, Yuan Ma<sup>2</sup>, Bo Sun<sup>2</sup>, Liangyu Wang<sup>2</sup>, Haifei Lu<sup>2</sup>, Xiaoyan Wen<sup>2</sup>, Sisi Liu<sup>2,\*</sup>, Xumin Ding<sup>3</sup>

<sup>1</sup> Donghai Laboratory, Zhoushan Zhejiang 316021, China

<sup>2</sup> School of Science, Wuhan University of Technology, Wuhan, Hubei 430070, China

<sup>3</sup> Advanced Microscopy and Instrumentation Research Center, School of Instrumentation Science and Engineering, Harbin Institute of Technology

\* Correspondence: mingyuli.oliver@gmail.com (M.-Y.L.); liusisi0109@hotmail.com (S.L.)

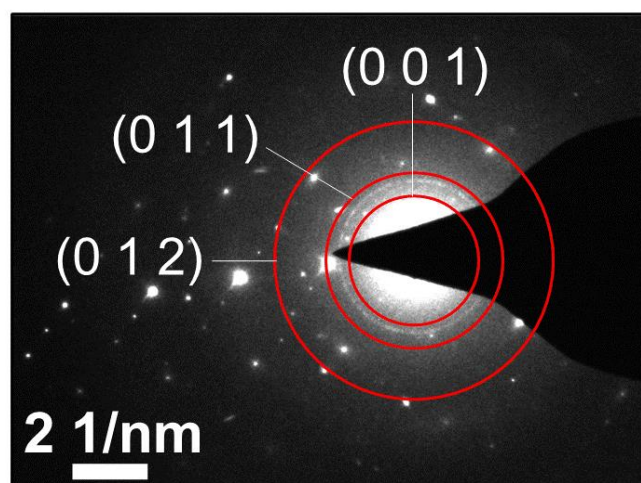

**Figure S1.** The selected area electron diffraction (SAED) pattern image of the CsPbBr<sub>3</sub> QD/*p*-MSB NP solutions by blending with 1 mg/mL *p*-MSB.

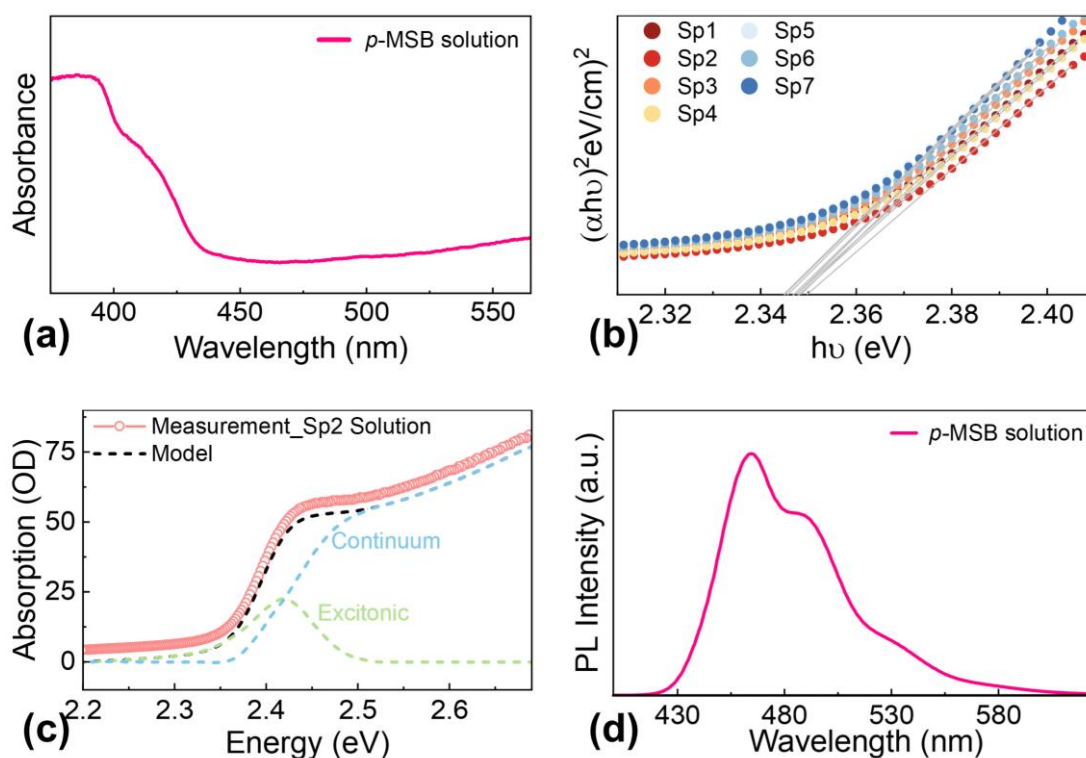

**Figure S2.** (a) Absorption spectra of *p*-MSB NP solutions. (b) The Tauc plots of CsPbBr<sub>3</sub> QD/*p*-MSB NP solutions. (c) Absorption spectrum and Elliott's model of the CsPbBr<sub>3</sub> QD/*p*-MSB NP solutions by blending with 1 mg/mL *p*-MSB. (d) normalized PL spectra of *p*-MSB NP solutions.

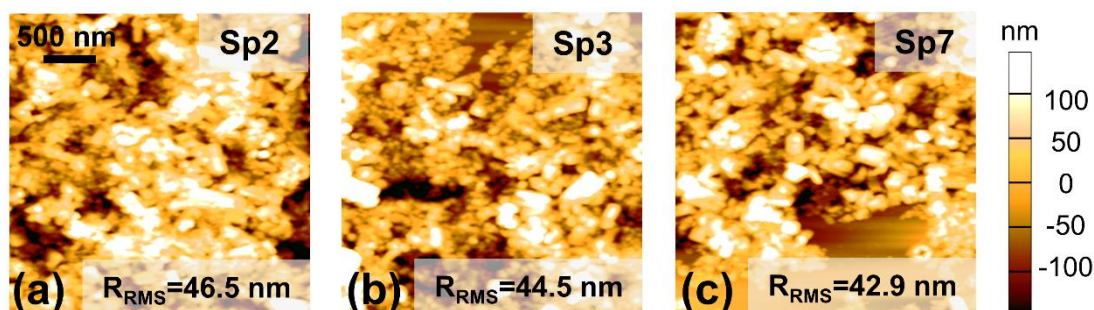

**Figure S3.** Atomic force microscopy (AFM) images of the samples: (a) Sp2, (b) Sp3, (c) Sp7.

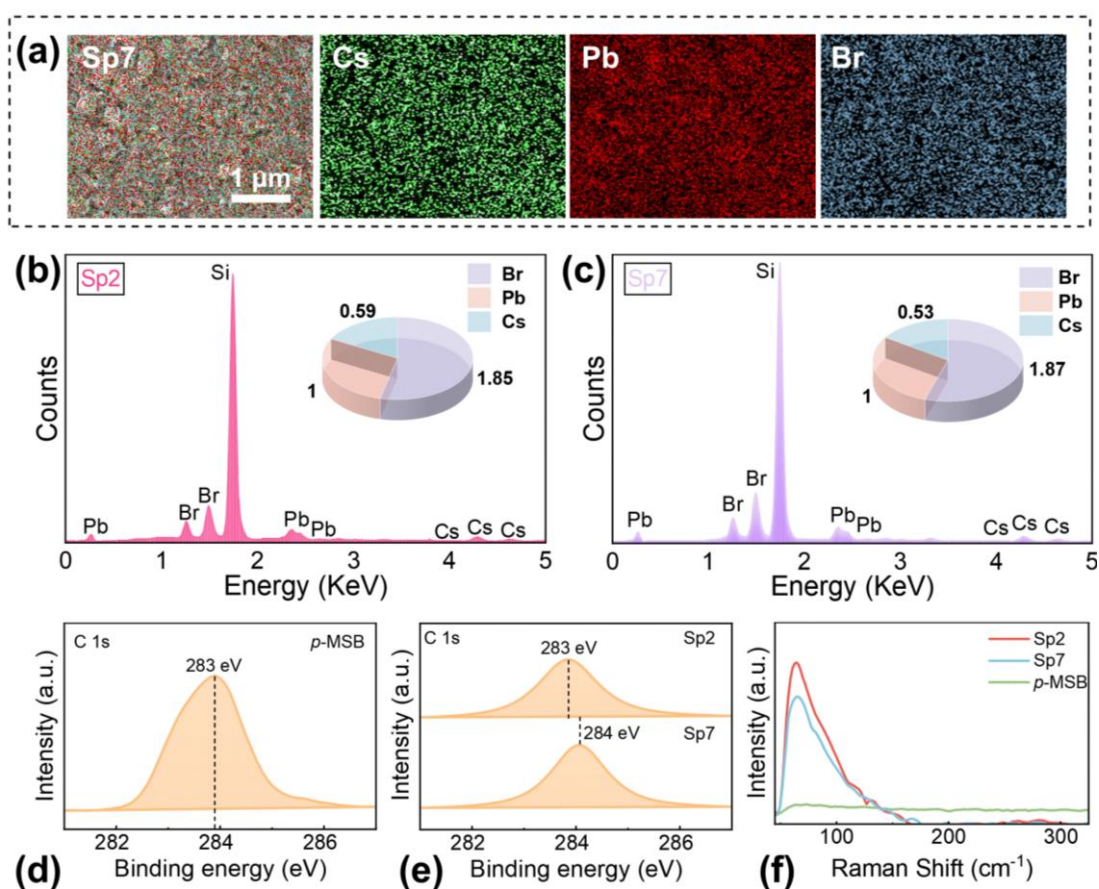

**Figure S4.** (a) Energy dispersive X-ray spectroscopy (EDS) element maps of the sample Sp7. EDS spectra of the samples (b) Sp2 and (c) Sp7. X-ray photoelectron spectroscopy (XPS) spectra of C 1s signatures on the (d) *p*-MSB and (e) Sp2 and Sp7 samples. (f) Raman spectra of Sp2, Sp7 and *p*-MSB measured with a 532 nm excitation laser.

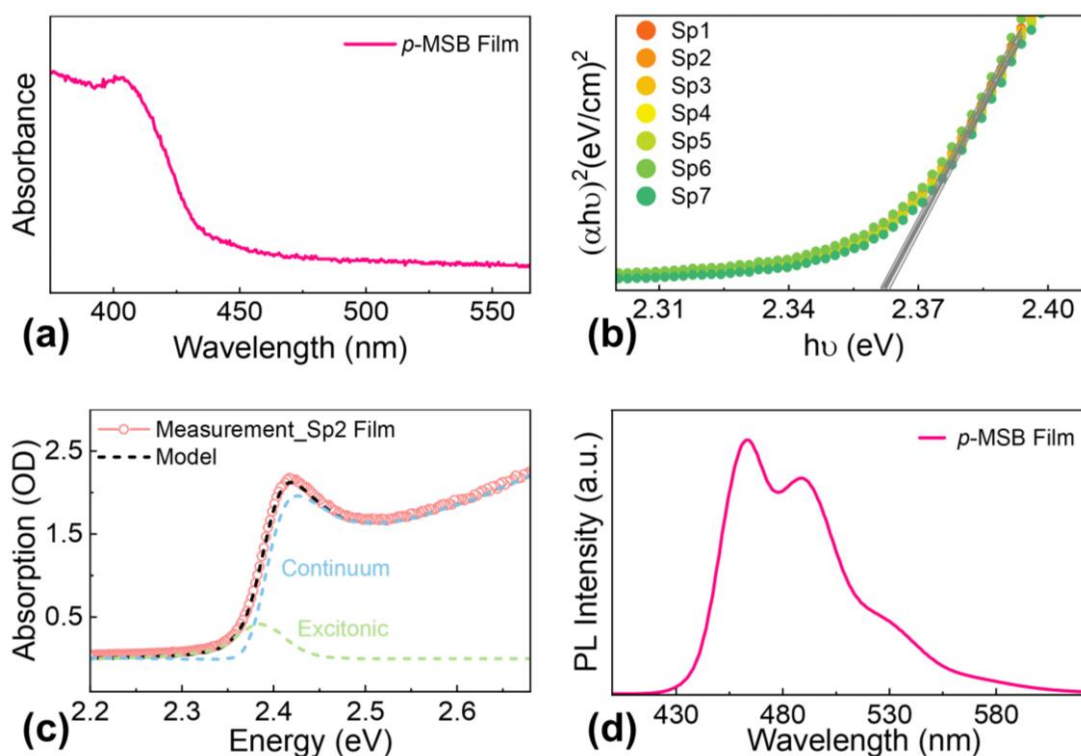



**Figure S5.** (a) Absorption spectra of *p*-MSB thin films. (b) The Tauc plots of CsPbBr<sub>3</sub> QD/*p*-MSB NP thin films. (c) Absorption spectrum and Elliott's model of the CsPbBr<sub>3</sub> QD/*p*-MSB NP films by blending with 1 mg/mL *p*-MSB. (d) Normalized PL spectra of *p*-MSB thin films.

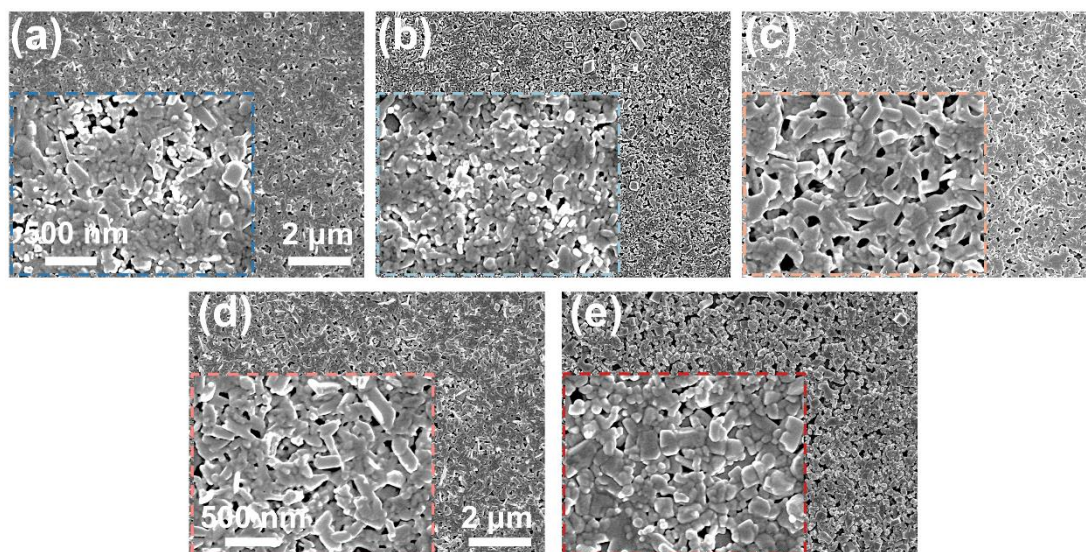

**Figure S6.** Scanning electron microscope (SEM) images of the hybrid CsPbBr<sub>3</sub> QD/*p*-MSB NP thin films with 1 mg/mL *p*-MSB at different annealing temperatures: (a) 25 °C, (b) 40 °C, (c) 60 °C, (d) 80 °C, and (e) 100 °C.

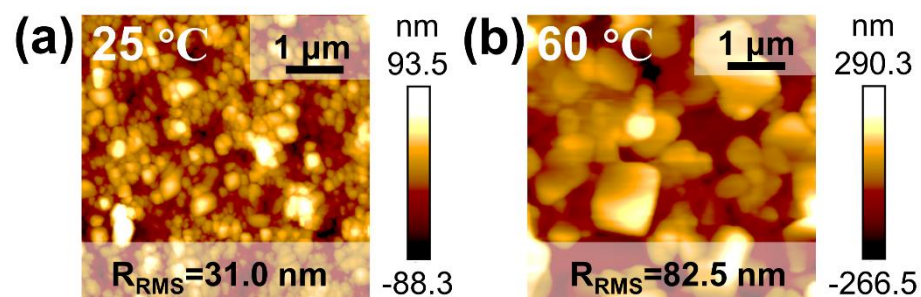

**Figure S7.** Atomic force microscopy (AFM) of the hybrid CsPbBr<sub>3</sub> QD/*p*-MSB NP thin films with 1 mg/mL *p*-MSB at different annealing temperatures: (a) 25 °C and (b) 60 °C.

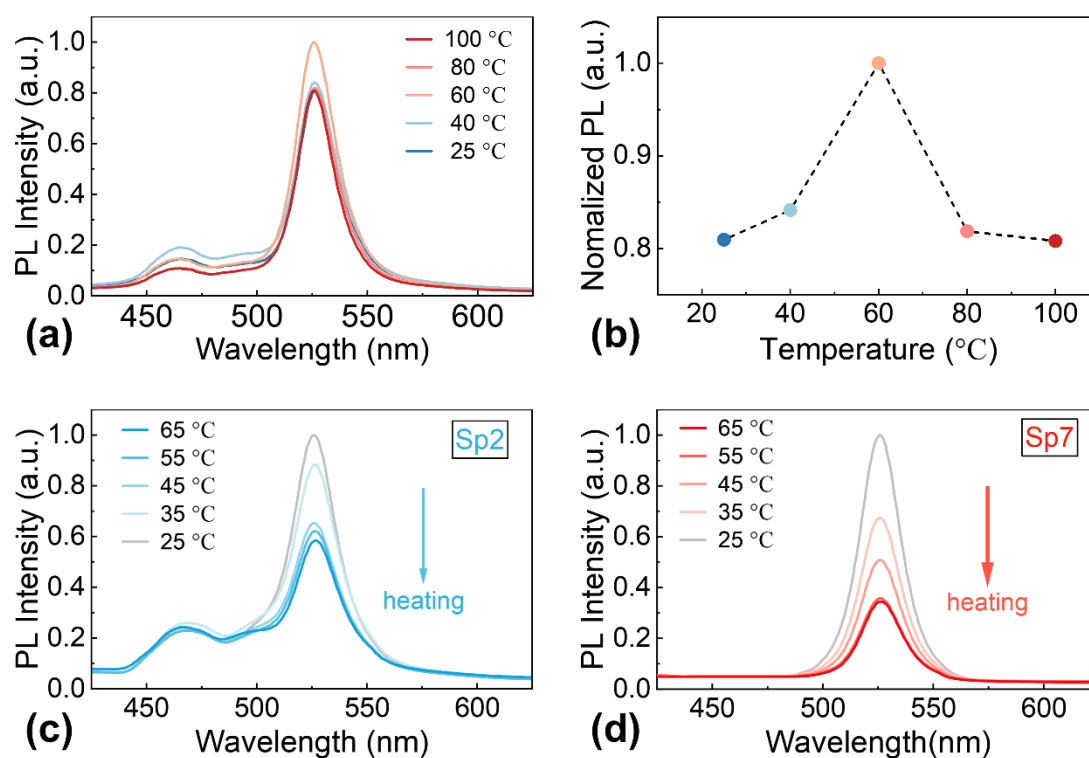

**Figure S8.** (a) Normalized room-temperature PL spectra and (b) the plots of PL intensities of hybrid CsPbBr<sub>3</sub> QD/*p*-MSB NP thin films with 1 mg/mL *p*-MSB fabricated at different annealing temperatures. Normalized PL spectra of the samples (c) Sp2 and (d) Sp7 after heating at various temperatures.

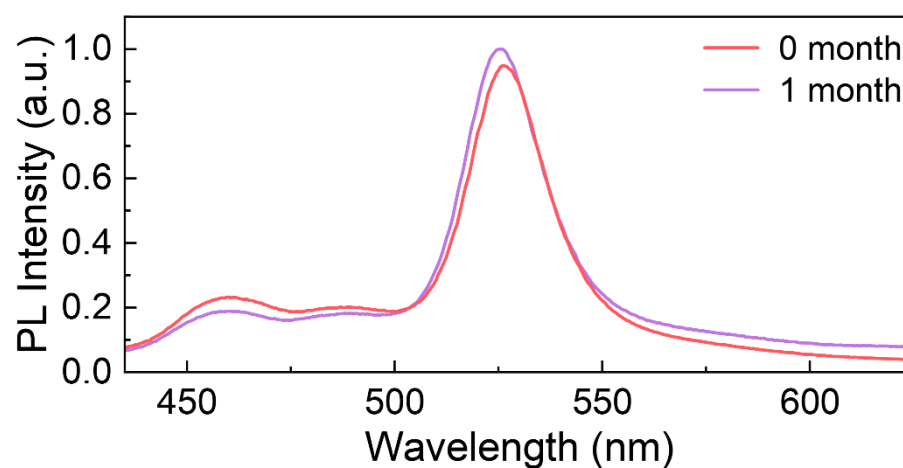

**Figure S9.** Normalized photoluminescence (PL) spectra of the sample Sp2 as-fabricated (red) and after storing for 1 month (purple) in atmospheric ambient air.

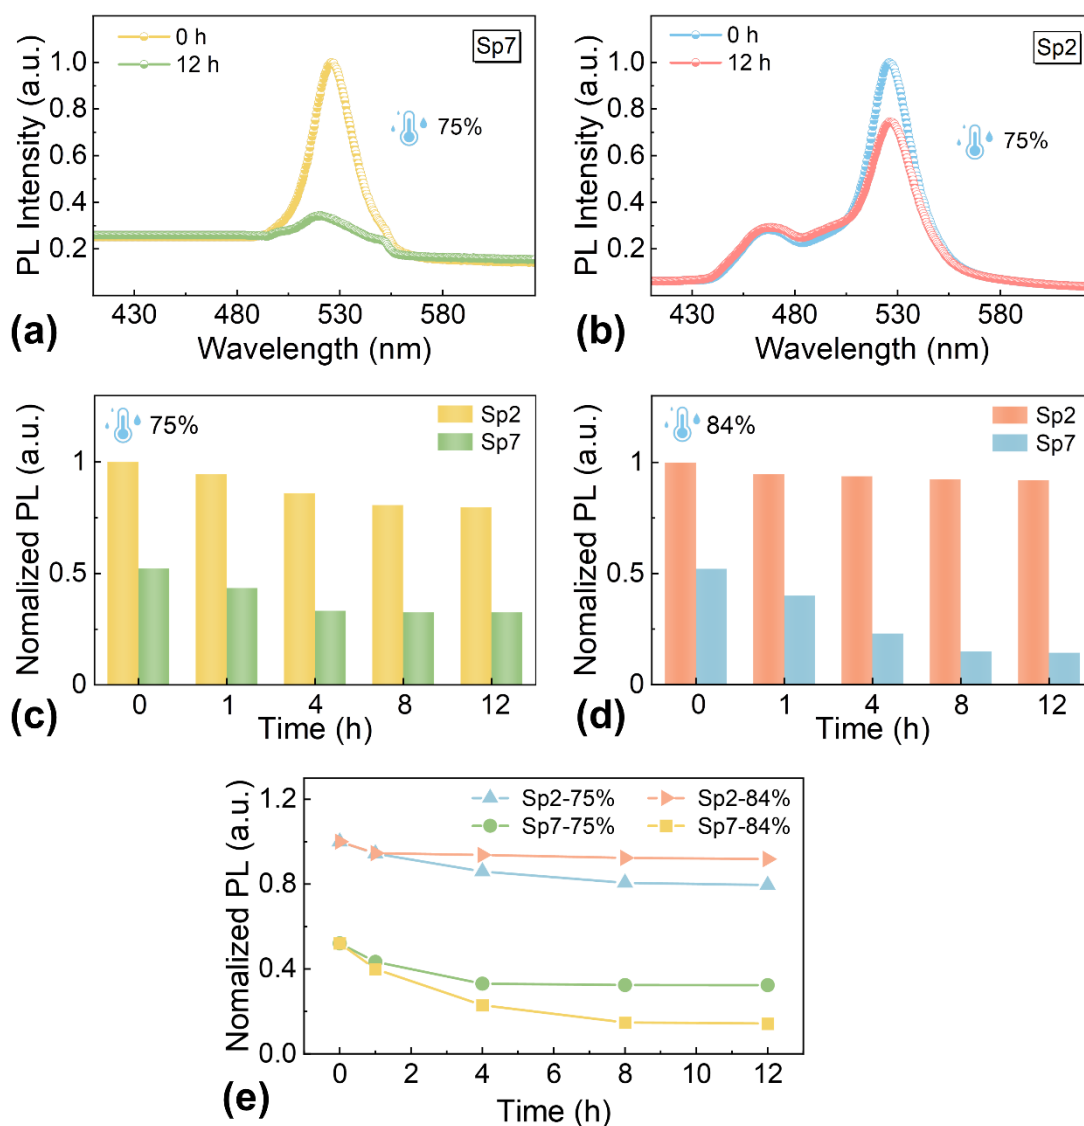

**Figure S10.** Normalized PL spectra of the sample (a) Sp7 and (b) Sp2 as-fabricated and after storing for 12 h at 75% RH. Normalized PL spectra of the sample Sp7 and Sp2 at (c) 75% RH and (d) 84% RH. (e) The time-dependent PL intensities as a function of relative humidity of the samples Sp2 and Sp7.

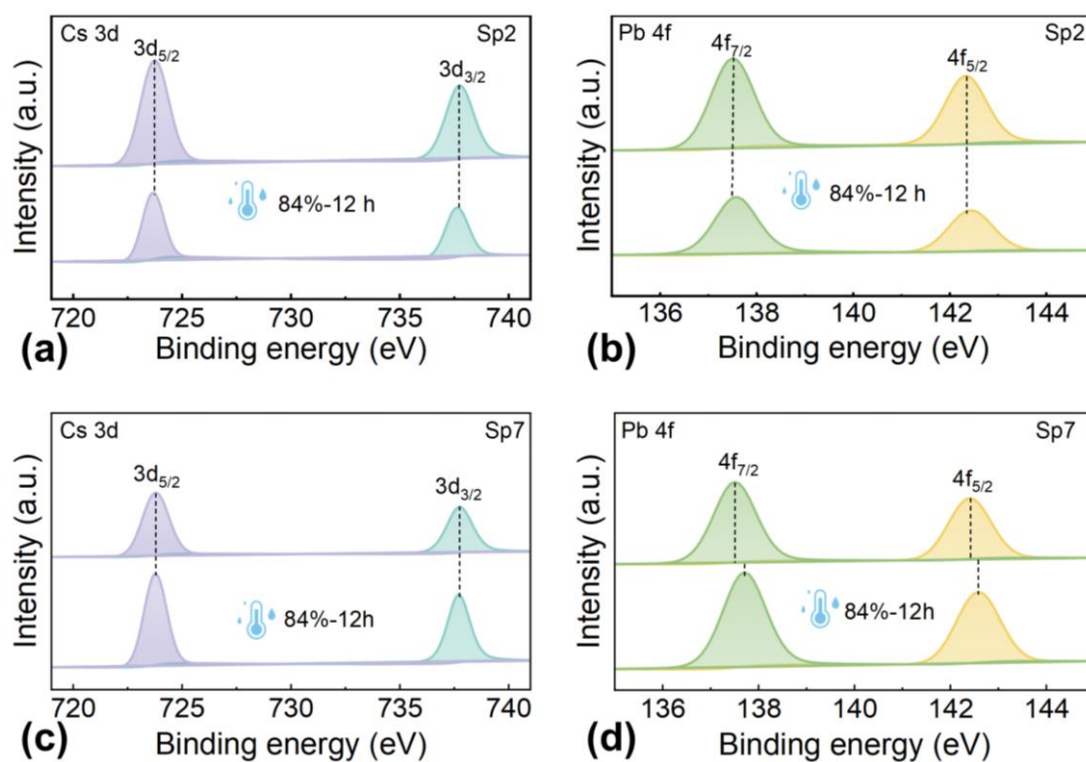

**Figure S11.** X-ray photoelectron spectroscopy (XPS) spectra of (a) Cs 3d and (b) Pb 4f signatures on the samples Sp2 as-fabricated and after storing for 12 h at 84% RH. (c) X-ray photoelectron spectroscopy (XPS) spectra of (c) Cs 3d and (d) Pb 4f signatures on the samples Sp7 as-fabricated and after storing for 12 h at 84% RH.

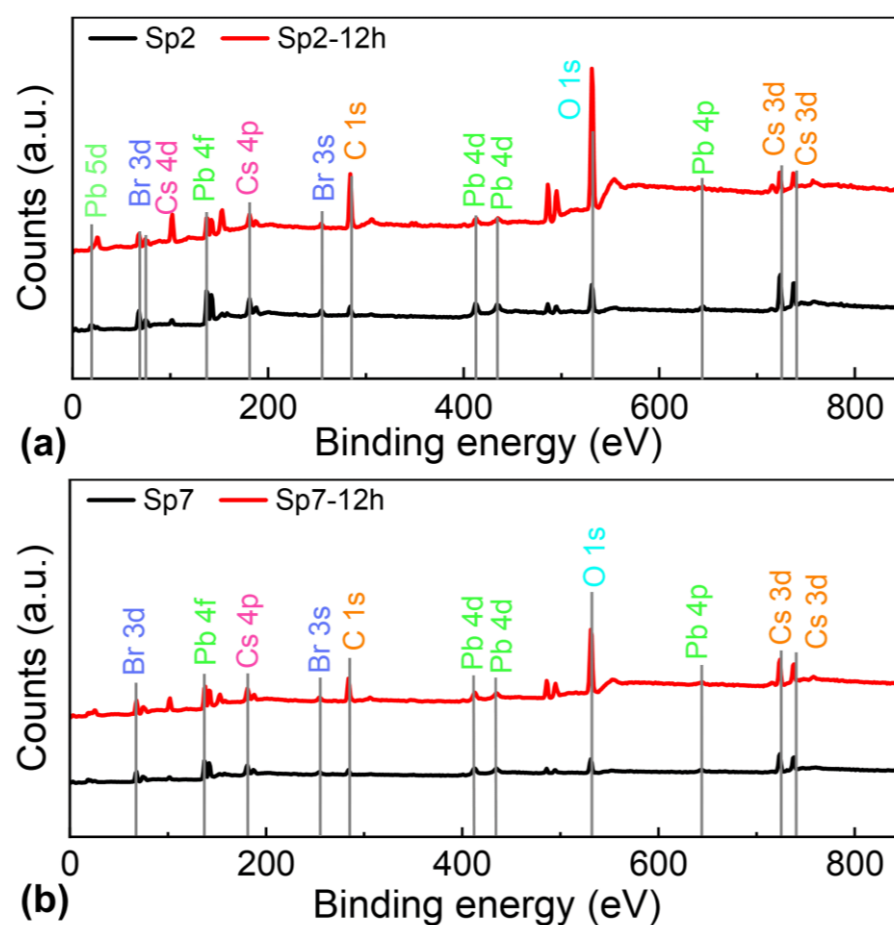

**Figure S12.** The full-range survey scan XPS spectra of the samples (a) Sp2 and (b) Sp7 as-fabricated and after storing for 12 h at 84% RH.

**Table S1.** PL Decay Time Constants ( $\tau_1$ ,  $\tau_2$ , and  $\tau_3$ ) and Average Lifetimes ( $\tau_{avg}$ ) of Sp2 and Sp7.

|     | $A_1(\%)$ | $\tau_1$ (ns) | $A_2(\%)$ | $\tau_2$ (ns) | $A_3(\%)$ | $\tau_3$ (ns) | $\tau_{avg}$ (ns) |
|-----|-----------|---------------|-----------|---------------|-----------|---------------|-------------------|
| Sp2 | 51.84     | 3.35          | 40.07     | 13.44         | 8.09      | 53.20         | 11.43             |
| Sp7 | 24.25     | 47.61         | 56.49     | 38.28         | 19.25     | 5.74          | 34.27             |

**Table S2.** PL Decay Time Constants ( $\tau_1$ ,  $\tau_2$ , and  $\tau_3$ ) and Average Lifetimes ( $\tau_{avg}$ ) of Sp2 at different annealing temperatures.

|       | $A_1(\%)$ | $\tau_1$ (ns) | $A_2(\%)$ | $\tau_2$ (ns) | $A_3(\%)$ | $\tau_3$ (ns) | $\tau_{avg}$ (ns) |
|-------|-----------|---------------|-----------|---------------|-----------|---------------|-------------------|
| 25 °C | 45.08     | 3.18          | 41.19     | 13.49         | 13.73     | 52.16         | 14.15             |
| 60 °C | 36.83     | 3.35          | 44.96     | 16.09         | 18.21     | 55.69         | 18.97             |
